# Supplementary material
Source: Springer Nature journal article supplement (https://www.springermedizin.de/resource/supplementary/12995_2014_274_MOESM1_ESM.pdf/9623054)
Supplement: MOESM1 [file 9623054]

**Chemical and biological work-related risks  
across occupations in Europe: a review  
Supplementary tables**

Author:

Diego Montano

Faculty of Medicine

Senior professorship “Work Stress Research”

Duesseldorf University

March 2014

---

## List of Tables

|    |                                               |    |
|----|-----------------------------------------------|----|
| 1. | Carcinogens of the IARC group 1 . . . . .     | 3  |
| 2. | Sensitising substances . . . . .              | 6  |
| 3. | Mutagenic and reprotoxic substances . . . . . | 15 |
| 4. | Pathogens by species and risk group . . . . . | 19 |

## A . List of carcinogens

**Table 1:** Carcinogens of the IARC group 1. Sources: [1, 2, 3, 4, 5, 6, 7, 8]

| CAS        | Agent                                                  | Some uses (or remarks)                                                                                                                                      | ISCO       | Cancer site (or type)                                   | Banned in the EU | Exposed EU 1990-3 (thousands) | Deaths UK |
|------------|--------------------------------------------------------|-------------------------------------------------------------------------------------------------------------------------------------------------------------|------------|---------------------------------------------------------|------------------|-------------------------------|-----------|
|            | Acid mists, strong inorganic                           | Production of phosphate fertilizers, isopropanol, synthetic ethanol, lead batteries                                                                         | 2, 8       | Larynx                                                  | no               | 710                           | 1494      |
| 1402-68-2  | Aflatoxins                                             | Toxic metabolite of the common fungus <i>Aspergillus flavus</i>                                                                                             | 2, 6       | Liver                                                   | yes              | 2                             | NA        |
|            | Aluminium production (exposure to PAH)                 | Construction, transportation, packaging                                                                                                                     | 8          | Bladder, lung                                           | NA               | NA                            | NA        |
| 92-67-1    | 4-Aminobiphenyl                                        | Rubber antioxidant, dye intermediate                                                                                                                        | 8          | Bladder                                                 | no               | NA                            | 558       |
| 36465-76-6 | Arsenic and inorganic arsenic compounds                | Pharmaceuticals, agricultural chemicals, mining, metallurgy                                                                                                 | 3, 6, 8    | Lung, bladder, skin                                     | no               | 150                           | 2034      |
|            | Asbestos (and talc containing asbestos-form fibres)    | Roofing, thermal and electrical insulation, cement pipe and sheets, flooring, friction materials, coating and compounds, plastics, textiles, paper, mastics | 3, 6, 8, 9 | Lung, mesothelioma, larynx, ovary                       | yes              | 1228                          | 70362     |
|            | Auramine production                                    | Paper dyeing and flexographic printing                                                                                                                      | 8          | Bladder                                                 | no               | NA                            | NA        |
| 71-43-2    | Benzene                                                | Production of plastics, resins, nylon fibers, dyes, detergents, gasoline                                                                                    | 5, 8, 9    | Acute myeloid leukaemia/acute non-lymphocytic leukaemia | no               | 1400                          | 72        |
| 71-43-2    | Benzidine (and benzidine-based dyes)                   | Azo dyes for wool, cotton, leather                                                                                                                          | 3, 8       | Bladder                                                 | yes              | 7                             | NA        |
| 50-32-8    | Benzo[a]pyrene (Polycyclic aromatic hydrocarbon - PAH) | Coal industry, incomplete combustion of organic material                                                                                                    | 3, 8       | Lung and multiple sites                                 | no               | 980                           | NA        |
| 7440-41-7  | Beryllium and beryllium compounds                      | Used in the production of alloys for aerospace, automotive, or biomedical applications                                                                      | 2, 3, 8    | Lung                                                    | no               | 67                            | 108       |
| 542-88-1   | Bis(chloromethyl)ether; chloromethyl methyl ether      | Chemical intermediates and alkylating agents                                                                                                                | 3, 8       | Lung                                                    | no               | 2                             | NA        |
| 106-99-0   | 1,3-Butadiene                                          | Production of synthetic rubbers and polymers                                                                                                                | 3, 8       | Haematolymphatic organs                                 | no               | 32                            | 18        |

Continues on the next page ...

| CAS        | Carcinogenic agent                                                                                               | Some uses (or remarks)                                                                                                 | ISCO          | Cancer site (or type)                                                                                                                                | Banned in the EU | Exposed EU 1990-3 (thousands) | Deaths UK |
|------------|------------------------------------------------------------------------------------------------------------------|------------------------------------------------------------------------------------------------------------------------|---------------|------------------------------------------------------------------------------------------------------------------------------------------------------|------------------|-------------------------------|-----------|
| 7440-43-9  | Cadmium and cadmium compounds                                                                                    | Production of nickel-cadmium batteries, pigments, coatings and platin, stabilizers for plastics                        | 3, 8, 9       | Lung                                                                                                                                                 | no               | 210                           | 144       |
| 18540-29-9 | Chromium (VI) compounds                                                                                          | Pigment for textile dyes, paints, inks and plastics, corrosion inhibitors, wood preservatives, leather tanning         | 3, 6, 8       | Lung                                                                                                                                                 | no               | 800                           | 1170      |
|            | Coal gasification (exposure to PAH, asbestos, silica, amines, arsenic, cadmium)                                  | Production of fuel gas                                                                                                 | 3, 8          | Lung                                                                                                                                                 | no               | NA                            | NA        |
| 8007-45-2  | Coal-tar distillation                                                                                            | Coal tar: anti-corrosion coatings, wood preservatives, binders for electrodes                                          | 3, 8          | Skin, scrotum                                                                                                                                        | no               | NA                            | NA        |
| 65996-93-2 | Coal-tar pitch                                                                                                   | Electrode manufacturing, roofing, paving                                                                               | 3, 8          | Lung                                                                                                                                                 | no               | NA                            | 72        |
|            | Coke production                                                                                                  | As fuel in steel production                                                                                            | 3, 8          | Lung                                                                                                                                                 | no               | NA                            | NA        |
|            | Engine exhaust, diesel                                                                                           | Exposure to benzene, PAHs, and other gaseous and particulate substances                                                | 2, 3, 5, 8, 9 | Lung                                                                                                                                                 | no               | 3000                          | 11736     |
| 75-21-8    | Ethylene oxide                                                                                                   | Raw material for production of mono-ethylene glycol (agrochemicals, plastics, pharmaceuticals, textiles)               | 2, 3, 6, 7, 8 | Lymphoid tumours                                                                                                                                     | no               | 47                            | 0         |
| 50-00-0    | Formaldehyde                                                                                                     | Production of various types of resin used in the wood, plastic and other industries                                    | 2, 8, 9       | Nasopharynx, leukaemia                                                                                                                               | no               | 990                           | 144       |
|            | Ionizing radiation (X- and gamma-radiation including Radon-222 and its decay products)                           | Nuclear power production and fuel recycling, military activities, industrial operations, flying and medical procedures | 2, 3, 5, 8    | Salivary gland, oesophagus, stomach, colon, lung, bone, basal cell of the skin, female breast, kidney, bladder, brain and CNS, thyroid and leukaemia | no               | 2843                          | 3366      |
|            | Iron and steel founding (occupational exposure during)Methoxsalen (8-methoxypsoralen) plus ultraviolet radiation | Exposure to various genotoxic and carcinogenic substances including PAHs, metals, formaldehyde                         | 3, 8          | Lung                                                                                                                                                 | NA               | NA                            | 450       |
|            | Leather dust                                                                                                     | Shoe manufacture and repair. Exposure to various carcinogenic agents                                                   | 7,8           | Nasal cavity, paranasal sinuses                                                                                                                      | no               | NA                            | 180       |
|            | Magenta production                                                                                               | Manufacture of dyes                                                                                                    | 8             | Bladder                                                                                                                                              | no               | NA                            | NA        |

Continues on the next page ... ..

| CAS        | Carcinogenic agent                                              | Some uses (or remarks)                                                                                                                                       | ISCO    | Cancer site (or type)                                                                               | Banned in the EU | Exposed EU 1990-3 (thousands) | Deaths UK |
|------------|-----------------------------------------------------------------|--------------------------------------------------------------------------------------------------------------------------------------------------------------|---------|-----------------------------------------------------------------------------------------------------|------------------|-------------------------------|-----------|
| 101-14-4   | 4,4'-Methylenebis(2-chloroaniline) (MOCA)                       | Curing agent for polyurethane pre-polymers                                                                                                                   | 8       | Bladder                                                                                             | no               | NA                            | NA        |
|            | Mineral oils, untreated or mildly treated                       | Lubricants, agricultural spray oils, printing inks                                                                                                           | 8       | Skin (scrotum)                                                                                      | no               | NA                            | 10188     |
| 91-569-8   | 2-Naphthylamine                                                 | Rubber antioxidant, dye intermediate                                                                                                                         | 8       | Bladder                                                                                             | yes              | 2                             | NA        |
|            | Nickel compounds                                                | Used to form alloys, electroplatin ceramics, pigments, stainless steel, nickel-cadmium batteries                                                             | 3, 8    | Lung, nasal cavity, paranasal sinuses                                                               | no               | 560                           | 162       |
|            | Painter (occupational exposure as a)                            | Exposure to various genotoxic and carcinogenic substances including PAHs, azo dyes, benzene                                                                  | 7       | Mesothelioma, bladder, lung                                                                         | NA               | NA                            | 6012      |
| 1336-36-3  | Polychlorinated biphenyls                                       | Exposure in buildings and old devices contaminated with PCB                                                                                                  | 8, 9    | Melanoma                                                                                            | yes              | NA                            | 0         |
|            | Rubber manufacturing industry                                   | Exposure to various carcinogenic substances including PAHs, 2-naphthylamine                                                                                  | 3, 8    | Leukaemia, lymphoma, bladder, lung, stomach                                                         | NA               | NA                            | 90        |
| 68308-34-9 | Shale oils                                                      | As fuel and electricity generation                                                                                                                           | 8       | Skin (scrotum)                                                                                      | no               | NA                            | NA        |
| 14808-60-7 | Silica dust, crystalline, in the form of quartz or cristobalite | Manufacture of glass, ceramics, hydraulic fracturing applications                                                                                            | 3, 7, 8 | Lung                                                                                                | no               | 3200                          | 14202     |
|            | Solar radiation                                                 | Exposure to ultraviolet radiation (100-400 nm wavelength) from solar and artificial sources such as tanning devices                                          | 5, 9    | Cutaneous malignant melanoma, squamous cell carcinoma of the skin, basal cell carcinoma of the skin | NA               | 9100                          | 216       |
|            | Soot (as found in occupational exposure of chimney sweeps)      | By-product of combustion of organic materials                                                                                                                | 7       | Skin (scrotum), lung                                                                                | no               | NA                            | NA        |
| 1746-01-6  | 2,3,7,8-Tetrachlorodibenzo-para-dioxin                          | It has no known commercial applications. It may be produced during incineration, in metal processing, and in the bleaching of paper pulp with free chlorine. | 3, 8, 9 | All cancers combined                                                                                |                  | NA                            | 4158      |
|            | Tobacco smoke, second-hand                                      | Exposure to carcinogenic substances such as benzo[a]pyrene, 4-aminobiphenyl, benzene, ethylene oxide, N'-Nitrosornicotine                                    |         | Lung                                                                                                | yes              | 7500                          | 1062      |
| 95-53-4    | ortho-Toluidine                                                 | Intermediate in the synthesis of herbicides and manufacture of dyes                                                                                          | 3, 8    | Bladder                                                                                             | no               | NA                            | 4482      |

Continues on the next page ... ..

| CAS     | Carcinogenic agent | Some uses (or remarks)                                                         | ISCO    | Cancer site (or type)                        | Banned in the EU | Exposed EU 1990-3 (thousands) | Deaths UK |
|---------|--------------------|--------------------------------------------------------------------------------|---------|----------------------------------------------|------------------|-------------------------------|-----------|
| 79-01-6 | Trichloroethylene  | Used in metal cleaning or degreasing, and as a solvent in the rubbers industry | 3, 8    | Kidney                                       | no               | NA                            | 72        |
| 75-01-4 | Vinyl chloride     | Manufacture of polyvinyl chloride (PVC), floor coverings                       | 3, 8    | Liver                                        | no               | 40                            | 54        |
|         | Wood dust          | By-product of wood processing                                                  | 7, 8, 9 | Nasal cavity, paranasal sinuses, nasopharynx | no               | 2600                          | 342       |

## B . List of sensitising substances

**Table 2:** Sensitising substances. Sources: [9, 4, 5, 6, 10]

| CAS       | Sensitiser                                                         | Type | Somes uses (or remarks)                                                                                                                                        | Isco       | TTB                    |
|-----------|--------------------------------------------------------------------|------|----------------------------------------------------------------------------------------------------------------------------------------------------------------|------------|------------------------|
|           | Acrylic esters and methacrylates, various compounds                | Sh   | Acrylic esters are used commonly for the production of polymers. TTB for the precursor acrylic acid                                                            | 3, 8       | 1,000,000 - 10,000,000 |
| 101-54-2  | N 4-Aminodiphenylamine                                             | Sh   | Used as a dye intermediate and in the production of rubber                                                                                                     | 3, 8       | 10,000 - 100,000       |
| 141-43-5  | 2-Aminoethanol                                                     | Sh   | Intermediate for the production of aziridines used in coatings, water treatment, and in the petroleum industries                                               | 2, 3, 8    | 100,000 - 1,000,000    |
| 2855-13-2 | 3-Aminomethyl-3,5,5-trimethyl-cyclohexylamine (Isophorone diamine) | Sh   | Used as chemical intermediate in the production of hardeners for epoxy resins and coatings                                                                     | 3, 8       | 10,000 - 100,000       |
| 123-30-8  | p-Aminophenol                                                      | Sh   | Component of oxidative hair dyes                                                                                                                               | 3, 5, 8    | 1,000 - 10,000         |
| 9000-90-2 | a-Amylase                                                          | Sa   | Enzyme used in fermentation processes and pharmaceuticals                                                                                                      | 3, 6, 8    | 1,000 - 10,000         |
| 122-40-7  | a-Amylcinnamaldehyde                                               | Sh   | Used in perfumery and flavouring                                                                                                                               | 3, 5, 8    | NA                     |
| 62-53-3   | Aniline (including aminoazobenzenes)                               | Sh   | One of the most important building blocks in chemistry. It is used in the manufacture of rubber, dyes and pigments, agricultural chemicals and pharmaceuticals | 3, 6, 8, 9 | 1,000,000 - 10,000,000 |

Continues on the next page ...

| CAS        | Sensitiser                                                      | Type        | Somes uses (or remarks)                                                                                                                                                                                           | Isco                                                                                                                                                                                          | TTB            |                     |
|------------|-----------------------------------------------------------------|-------------|-------------------------------------------------------------------------------------------------------------------------------------------------------------------------------------------------------------------|-----------------------------------------------------------------------------------------------------------------------------------------------------------------------------------------------|----------------|---------------------|
|            | Animal hair, epithelia and other materials derived from animals | Sah         |                                                                                                                                                                                                                   | 3, 6, 7, 8                                                                                                                                                                                    | NA             |                     |
| 17804-35-2 | Antibiotics, various                                            | Sah         |                                                                                                                                                                                                                   | 2, 3, 8                                                                                                                                                                                       | NA             |                     |
|            | Benomyl                                                         | Sh          | Fungicide                                                                                                                                                                                                         | 3, 6, 8                                                                                                                                                                                       | NA             |                     |
| 2634-33-5  | 1,2-Benzisothiazol-3(2H)-one                                    | Sh          | Microbicide and fungicide                                                                                                                                                                                         | 3, 8                                                                                                                                                                                          | NA             |                     |
| 14548-60-8 | Benzyl alcohol mono(poly)hemiformal                             | Sh          | Benzyl alcohol is used as a chemical intermediate, in perfumery and flavoring, in textiles and plastics, cosmetics and pharmaceuticals                                                                            | 2, 3, 8                                                                                                                                                                                       | NA             |                     |
|            | Beryllium and its compounds                                     | Sah         | Nuclear absorbents, aircraft engines, guidance systems and brakes; X-ray tube windows, turbine reactor blades, dental castings and prostheses, tool and die, sporting goods, home appliances, integrated circuits | 2, 3, 8                                                                                                                                                                                       | NA             |                     |
| 25068-38-6 | Bisphenol-A-Epichlorhydrin resin                                | Epoxy resin | Sh                                                                                                                                                                                                                | Epoxy resins are used widely in industrial applications such as metal can coating, automotive primer, printed circuit boards, semiconductor encapsulants, adhesives, and aerospace composites | 2, 3, 8        | 100,000 - 1,000,000 |
| 52-51-7    | 2-Bromo-2-nitro-1,3-propanediol                                 | Sh          | Used as an antiseptic and an antimicrobial agent for cosmetic preservation                                                                                                                                        | 3, 8                                                                                                                                                                                          | 100 - 1,000    |                     |
| 96-29-7    | Butanone oxime                                                  | Sh          | Used as an anti-skinning agent in paints and lacquers, and as a blocking agent for isocyanates in polyurethanes                                                                                                   | 3, 8                                                                                                                                                                                          | 1,000 - 10,000 |                     |
| 2426-08-6  | n-Butyl glycidyl ether                                          | Sh          | Epoxy used as viscosity reducer                                                                                                                                                                                   | 3, 8                                                                                                                                                                                          | NA             |                     |
| 110-65-6   | Butynediol                                                      | Sh          | Added to electroplating baths as brightening agent                                                                                                                                                                | 3, 8                                                                                                                                                                                          | 100000         |                     |
| 9012-54-8  | Cellulases                                                      | Sa          | Used in the pharmaceutical, food and paper industry                                                                                                                                                               | 3, 8                                                                                                                                                                                          | 1,000 - 10,000 |                     |
|            | Cereal flour dusts (wheat, rye)                                 | Sa          |                                                                                                                                                                                                                   | 6, 7, 8                                                                                                                                                                                       | NA             |                     |
| 79-07-2    | 2-Chloroacetamide                                               | Sh          | Used as a biocide, as a preservative and antiseptic in cosmetics, and as an intermediate in the production of herbicides and insecticides                                                                         | 3, 6, 8                                                                                                                                                                                       | 100 - 1,000    |                     |
| 96-34-4    | Chloroacetic acid methyl ester                                  | Sh          | Solvent and intermediate                                                                                                                                                                                          | 3, 8                                                                                                                                                                                          | 1,000 - 10,000 |                     |
| 108-42-9   | m-Chloroaniline                                                 | Sh          | Used as an intermediate for pesticides, pharmaceuticals, and dyes                                                                                                                                                 | 3, 6, 8                                                                                                                                                                                       | 1-10           |                     |
| 59-50-7    | p-Chloro-m-cresol                                               | Sh          | External germicides, preservative for glues, gums, paints, inks, textile and leather goods                                                                                                                        | 3, 7, 8                                                                                                                                                                                       | 1-10           |                     |

Continues on the next page ... ..

| CAS        | Sensitiser                                                           | Type | Somes uses (or remarks)                                                                                                                                                                                                   | Isco       | TTB                 |
|------------|----------------------------------------------------------------------|------|---------------------------------------------------------------------------------------------------------------------------------------------------------------------------------------------------------------------------|------------|---------------------|
| 1897-45-6  | Chlorothalonil                                                       | Sh   | Used as a fungicide on vegetables, trees, fruits, turf, ornamentals, and other crops, as a wood preservative, as a biocide in paint                                                                                       | 3, 6, 7, 8 | NA                  |
| 50-53-3    | Chlorpromazine<br>(2-Chloro-10-(3-dimethylaminopropyl)phenothiazine) | Sp   | Antiemetic and antipsychotic drug in humans, and as tranquilizers in animals                                                                                                                                              | 2, 3, 8    | NA                  |
|            | Chromium(III) and (IV) compounds, soluble                            | Sh   | Chromium and its compounds are used in metal alloys such as stainless steel, protective coatings on metal; magnetic tapes, and pigments for paints, cement, paper, rubber, composition floor covering and other materials | 3, 7, 8, 9 | NA                  |
| 104-55-2   | Cinnamaldehyde                                                       | Sh   | Used as a brightener ion electroplating processes, as an animal repellent, as a flavourant in the food and perfume industry, in medical and the rubber industry                                                           | 2, 3, 5, 8 | 100 - 1,000         |
| 104-54-1   | Cinnamyl alcohol                                                     | Sh   | Used in the cosmetic industry in soaps, lotions, fragrances                                                                                                                                                               | 3, 8       | 1 - 10              |
| 513-79-1   | Cobalt carbonat                                                      | Sah  | Used in ceramics, manufacture of cobalt pigments and cobalt compounds, trace element added to solis, catalyst                                                                                                             | 3, 6, 8    | 1,000 - 10,000      |
| 420-04-2   | Cyanamide                                                            | Sh   | Used in agrochemical, pharmaceutical and industrial applications                                                                                                                                                          | 3, 6, 8    | 1,000 - 10,000      |
| 95-33-0    | N-Cyclohexyl-2-benzothiazolesulfenamide                              | Sh   | Accelerator for rubber vulcanization                                                                                                                                                                                      | 3, 8       | 10000               |
| 101-77-9   | 4,4'-Diaminodiphenylmethane                                          | Sh   | Used as an intermediate in the production of isocyanates, for preparation of plyurethane foams, spandex fibres, as a curing agent for epoxy resins, in the preparation of azo dyes                                        | 3, 8       | 10,000 - 100,000    |
| 120-78-5   | N 2,2'-Dibenzothiazyl disulfide                                      | Sh   | Accelerator for natural rubber and synthetic isoprene rubber                                                                                                                                                              | 3, 8       | 10,000 - 100,000    |
| 10222-01-2 | 2,2-Dibromo-2-cyanacetamide                                          | Sh   | Algecide, bactericide and fungicide. Used in the paper industry and industrial cooling systems                                                                                                                            | 3, 8       | NA                  |
| 35691-65-7 | 1,2-Dibromo-2,4-dicyanobutane                                        | Sh   | Preservative for latex paints, adhesives, dispersed pigments, joint cements, and as a microbiocide                                                                                                                        | 3, 5, 8    | NA                  |
| 542-75-6   | 1,3-Dichloropropene (cis and trans)                                  | Sh   | Pesticide                                                                                                                                                                                                                 | 3, 6, 8    | NA                  |
| 111-42-2   | Diethanolamine                                                       | Sh   | Production of lubricants for the textile industry, as intermediate in the rubber industry, as a humectant and softening agent, and in the agricultural, cosmetics and pharmaceutical industry                             | 3, 6, 8    | 100,000 - 1,000,000 |
| 111-40-0   | Diethylenetriamine                                                   | Sh   | Used as solvent, in the textile and military industry, as a component of epoxy resins for coatings                                                                                                                        | 0, 3, 8    | 10000               |

Continues on the next page ... ..



| CAS        | Sensitiser                                                        | Type | Some uses (or remarks)                                                                                                                                                                          | Isco          | TTB              |
|------------|-------------------------------------------------------------------|------|-------------------------------------------------------------------------------------------------------------------------------------------------------------------------------------------------|---------------|------------------|
| 793-24-8   | N N-(1,3-Dimethylbutyl)-N <sup>1</sup> -phenyl-p-phenylenediamine | Sh   | Antioxidant and antiozonant in the rubber industry                                                                                                                                              | 3, 8          | 10,000 - 100,000 |
| 57-14-7    | 1,1-Dimethylhydrazine                                             | Sh   | In the production of rocket fuel, in photography, and plant growth control agent                                                                                                                | 0, 3, 6, 8    | 1 - 10           |
| 6440-58-0  | 1,3-Dimethylol-5,5-dimethyl hydantoin                             | Sh   | Used as a preservative in cosmetic products, in the control of bacteria and fungi in liquid detergents and household cleaning products                                                          | 3, 8          | 100 - 1,000      |
| 94-37-1    | Dipentamethylenethiuram disulfide                                 | Sh   | Vulcanization accelerator in the rubber industry                                                                                                                                                | 3, 8          | NA               |
| 74-31-7    | N N,N-Diphenyl-p-phenylenediamine                                 | Sh   | Antioxidant for rubber, polyethylene, feedstuffs, and vegetable oils                                                                                                                            | 3, 6, 8       | NA               |
| 68516-81-4 | Disperse blue 106/124                                             | Sh   | Dyeing substance                                                                                                                                                                                | 3, 8          | NA               |
| 730-40-5   | Disperse Orange 3                                                 | Sh   | Dyeing substance                                                                                                                                                                                | 3, 8          | NA               |
| 2872-52-8  | Disperse Red 1                                                    | Sh   | Dyeing substance                                                                                                                                                                                | 3, 8          | NA               |
| 3179-89-3  | Disperse Red 17                                                   | Sh   | Dyeing substance                                                                                                                                                                                | 3, 8          | NA               |
| 2832-40-8  | Disperse Yellow 3                                                 | Sh   | Dyeing substance in textiles, sheepskins, furs, and for colouring nylon                                                                                                                         | 3, 8          | NA               |
| 97-77-8    | Disulfiram                                                        | Sh   | Vulcanization accelerator in the rubber industry                                                                                                                                                | 3, 8          | 1,000 - 10,000   |
| 7747-35-5  | 5-Ethyl-3,7-dioxa-1-azabicyclooctane                              | Sh   | Used in leather tanning, as a dye, finishing, impregnation and care products                                                                                                                    | 3, 7, 8       | 100 - 1,000      |
| 107-15-3   | Ethylenediamine                                                   | Sah  | Solvent for casein, albumin, and sulfur, emulsifier, stabilising rubber latex. Used in the preparation of dyes, synthetic waxes, resins, asphalt wetting agents, and as a herbicide             | 3, 8, 9       | 10000            |
| 97-53-0    | Eugenol                                                           | Sh   | Insecticide; used in perfumes, essential oils, analgesics, as flavorant                                                                                                                         | 3, 5, 6, 8    | 100 - 1,000      |
| 4602-84-0  | Farnesol                                                          | Sh   | Used in perfumery and flavouring                                                                                                                                                                | 3, 5, 8       | NA               |
| 50-00-0    | Formaldehyde                                                      | Sh   | Used as germicide, in the production of resins, wood products, plastics, fertilizers and foam insulation, in the textile industry, as a preservative and disinfectant, and as a hardening agent | 2, 3, 5, 6, 8 | 1000000          |
|            | Fragrance components                                              | Sh   | Widely differing substances (e.g. Balsam of Peru). Difficulties of assessing occupational exposure                                                                                              | 2, 4, 5, 8    | NA               |
| 106-24-1   | Geraniol                                                          | Sh   | Frequently used fragrance material used in flowery-roselike compositions and favour compositions in the food industry, in soaps and cosmetics                                                   | 3, 5, 8       | 1,000 - 10,000   |
| 111-30-8   | Glutaraldehyde                                                    | Sah  | Used in histology procedures, in fish farming to control viruses and micro-organisms, in cosmetics as a preservative, and in the textile industry                                               | 2, 3, 6, 8    | 1000             |

Continues on the next page ...

| CAS        | Sensitiser                                                             | Type | Somes uses (or remarks)                                                                                                                                                                                               | Isco       | TTB              |
|------------|------------------------------------------------------------------------|------|-----------------------------------------------------------------------------------------------------------------------------------------------------------------------------------------------------------------------|------------|------------------|
| 30618-84-9 | Glyceryl monothioglycolate                                             | Sh   | Used in permanent wave solutions in hairdressing                                                                                                                                                                      | 3, 5, 8    | 10 - 100         |
| 107-22-2   | Glyoxal                                                                | Sh   | Used in the paper industry for sizing, washable wall paper, treating glue surface of envelopes, in textile industry for preventing shrinking and creasing, and as a substitute for formaldehyde in embalming fluids   | 3, 5, 8    | 10,000 - 100,000 |
|            | Gold and its inorganic compounds                                       | Sh   | Gold compounds are used as electrolyte in the electroplating industry, in the manufacture of ruby glass, coloured enamels, and painting porcelain; in photography, gold plating, special inks, medicine               | 2, 3, 7, 8 | NA               |
| 12070-12-1 | Hard metal containing tungsten carbide and cobalt (inhalable fraction) | Sah  | Tungsten carbide is used in cemented carbide tools, dies, wear-resistant parts, cements, electrical resistors, and abrasive in liquids                                                                                | 3, 8, 9    | 10,000 - 100,000 |
| 85-42-7    | Hexahydrophthalic anhydride                                            | Sa   | Intermediate for alkyds, plasticizers, insect repellents, and rust inhibitors, and hardener in epoxy resins                                                                                                           | 3, 8       | 10,000 - 100,000 |
| 822-06-0   | 1,6-Hexamethylene diisocyanate                                         | Sah  | Production of polyurethanes, which are processed to adhesives, insulating foams, lacquers, and foams                                                                                                                  | 3, 7, 8, 9 | 10,000 - 100,000 |
| 100-97-0   | Hexamethylenetetramine                                                 | Sh   | Used in adhesives, coatings, sealing compounds, in the chemical detection of metals, for vulcanizing rubber, as corrosion inhibitor for steel, as dye fixative, and antimicrobial food additive                       | 3, 8       | 10,000 - 100,000 |
| 302-01-2   | Hydrazine                                                              | Sh   | Most important uses are as polymerization initiators                                                                                                                                                                  | 3, 8       | 10,000 - 100,000 |
| 123-31-9   | Hydroquinone                                                           | Sh   | Used in photographic applications, rubber industry, monomer inhibitors, dyes, pigments, agricultural chemicals                                                                                                        | 3, 6, 8    | 10,000 - 100,000 |
| 107-75-5   | Hydroxycitronellal                                                     | Sh   | Blender used in perfumery                                                                                                                                                                                             | 3, 5, 8    | NA               |
| 7803-49-8  | Hydroxylamine and its salts                                            | Sh   | Reducing agent in photography, synthetic and analytical chemistry. Used to purify ketones, as antioxidant for fatty acids and soaps, as dehairing agent for hides                                                     | 3, 5, 8, 9 | 1,000 - 10,000   |
| 31906-04-4 | 4-(4-Hydroxy-4-methylpentyl)-3-cyclohexene-1-carboxaldehyde            | Sh   | Used in fragrance compositions                                                                                                                                                                                        | 3, 5, 8    | NA               |
| 55406-53-6 | 3-Iodo-2-propynyl butyl-carbamate                                      | Sh   | Fungicide and antimicrobial used in industry and residential settings. Used in the manufacturing of paints, adhesives, in metal cutting and drilling fluids, in paper coating, canvas and wood products manufacturing | 3, 5, 8    | NA               |

Continues on the next page ... ..

| CAS        | Sensitiser                                                 | Type | Some uses (or remarks)                                                                                                                                                                                                                                          | Isco       | TTB                 |
|------------|------------------------------------------------------------|------|-----------------------------------------------------------------------------------------------------------------------------------------------------------------------------------------------------------------------------------------------------------------|------------|---------------------|
| 97-54-1    | Isoeugenol                                                 | Sh   | Manufacture of vanillin for the food industry. Used also as a fragrance in household laundry, cleaning products especially laundry powders and liquids, dish-washing liquids, hard surface cleaning products, and toilet cleansing products                     | 3, 5, 8, 9 | NA                  |
| 4098-71-9  | Isophorone diisocyanate                                    | Sah  | Production of polyurethanes, raw material for polyurethane paints, in industrial coating applications, and electrostatic powder coatings                                                                                                                        | 3, 8       | 10,000 - 100,000    |
| 101-72-4   | N-Isopropyl-N'-phenyl-p-phenylenediamine                   | Sh   | Protection of rubbers against oxidation, ozone, flex-cracking                                                                                                                                                                                                   | 3, 8       | 1,000 - 10,000      |
| 138-86-3   | D,L-Limonene and similar mixtures                          | Sh   | Various applications in the food and cosmetics industry and as a solvent                                                                                                                                                                                        | 3, 8       | NA                  |
| 108-31-6   | Maleic anhydride                                           | Sah  | Manufacture of resins, dye intermediates, in pharmaceuticals, agricultural chemicals                                                                                                                                                                            | 3, 6, 8    | 1,000 - 10,000      |
| 12427-38-2 | Manganous ethylenebis(dithiocarbamate)                     | Sh   | Fungicide for vegetables, for seed treatment of vegetables and field crops, for deciduous fruits and nuts                                                                                                                                                       | 3, 6, 8    | NA                  |
| 129-16-8   | Merbromin                                                  | Sh   | Antibacterial and antiseptic                                                                                                                                                                                                                                    | 2, 3, 8    | NA                  |
| 149-30-4   | 2-Mercaptobenzothiazole                                    | Sh   | Vulcanization accelerator for rubber and corrosion inhibitor                                                                                                                                                                                                    | 3, 8       | 1,000 - 10,000      |
|            | Mercury (metallic mercury and inorganic mercury compounds) | Sh   | Mercury compounds are used in treating seeds for fungi and seedborne diseases, as timber preservatives, and disinfectants in batteries (mercuric oxide), pigments, catalysts, explosives, in laboratory-based research, and in some pharmaceutical applications | 2, 3, 6, 8 | NA                  |
| 4080-31-3  | Methenamin 3-chlorallylchloride                            | Sh   | Used in pesticides, industrial adhesives and coatings, textiles, cosmetics, soaps, hair care products                                                                                                                                                           | 3, 5, 8    | NA                  |
| 66204-44-2 | N,N'-Methylene-bis(5-methyloxazolidine)                    | Sh   | Metal working fluid                                                                                                                                                                                                                                             | 3, 8       | NA                  |
| 101-68-8   | 4,4'-Methylene diphenyl diisocyanate                       | Sah  | Used primarily to make rigid and semi-rigid polyurethane foams                                                                                                                                                                                                  | 3, 8       | 100,000 - 1,000,000 |
| 2682-20-4  | N 2-Methyl-4-isothiazolin-3-one                            | Sh   | Used as a biocide and preservative                                                                                                                                                                                                                              | 2, 3, 8, 9 | NA                  |
| 11070-44-3 | Methyltetrahydrophthalic anhydride                         | Sa   | Hardener for Epoxy Resins                                                                                                                                                                                                                                       | 3, 8       | 10,000 - 100,000    |
| 479-45-8   | N-Methyl-2,4,6-N-tetranitroaniline                         | Sh   | Used as an explosive in detonators and primers                                                                                                                                                                                                                  | 0, 3, 8    | NA                  |
| 78-94-4    | Methyl vinyl ketone                                        | Sh   | Used as a starting material for plastics; as intermediate in synthesis of steroids and vitamin A                                                                                                                                                                | 3, 8       | NA                  |

Continues on the next page ... .

| CAS        | Sensitiser                                                        | Type | Some uses (or remarks)                                                                                                           | Isco       | TTB              |
|------------|-------------------------------------------------------------------|------|----------------------------------------------------------------------------------------------------------------------------------|------------|------------------|
|            | N Microbial rennets: endo-thiapsin and mucor-pepsin               | Sa   | Rennets are enzymes used to make cheese and custards and as a therapeutic digestive enzyme                                       | 3, 6, 8    | NA               |
| 60-34-4    | Monomethylhydrazine                                               | Sh   | Used as an antibiotic, as a chemical intermediate, and in rocket fuel                                                            | 0, 3, 8    | 100 - 1,000      |
| 102-77-2   | N 2-(4-Morpholinylmercapto)benzothiazole                          | Sh   | Used as a delayed action vulcanization accelerator                                                                               | 3, 8       | 1,000 - 10,000   |
| 300-76-5   | Naled                                                             | Sh   | Insecticide used for numerous crops and in food processing plants                                                                | 3, 6, 8    | NA               |
| 3173-72-6  | 1,5-Naphthylene diisocyanate                                      | Sa   | Used in painting, and in the production of plastics                                                                              | 3, 8       | 1,000 - 10,000   |
| 9006-04-6  | Natural rubber latex                                              | Sah  | Frequent exposure when using latex-based gloves                                                                                  | 2, 5, 6, 9 | NA               |
|            | Nickel and nickel compounds                                       | Sah  | Used to form alloys, electroplating ceramics, pigments, stainless steel, nickel-cadmium batteries. TBB for nickel                | 3, 8       | NA               |
| 91-29-2    | 4-Nitro-4'-aminodiphenylamine-2-sulfonic acid                     | Sh   | Intermediate in the manufacture of dyes                                                                                          | 3, 8       | 100 - 1,000      |
| 5307-14-2  | 2-Nitro-p-phenylenediamine                                        | Sh   | In dyeing furs brown and reddish brown, and as dye intermediate in semi-permanent and permanent hair dye formulations            | 3, 5, 8    | NA               |
|            | Oakmoss extracts                                                  | Sh   | Used in the production of perfumes                                                                                               | 3, 5, 8    | NA               |
| 26530-20-1 | 2-Octyl-4-isothiazolin-3-one                                      | Sh   | Fugicide used in wood coatings                                                                                                   | 3, 5, 7, 8 | NA               |
| 23696-28-8 | Olaquinox (N-(2-Hydroxyethyl)-3-methyl-2-quinoxalinecarboxamide)  | SP   | Animal feed additive                                                                                                             | 3, 6, 8    | NA               |
| 7647-10-1  | Palladium chloride and other bioavailable palladium(II) compounds | Sh   | Use in toning solutions, photography, electroplating parts of clocks and watches; manufacture of indelible ink                   | 3, 8       | NA               |
| 9001-73-4  | Papain                                                            | Sa   | Used in the food and textile industry                                                                                            | 3, 8       | NA               |
| 9001-75-6  | Pepsin                                                            | Sa   | Used in the food and textile industry and chemistry                                                                              | 2, 3, 8    | NA               |
| 108-45-2   | m-Phenylenediamine                                                | Sh   | Used as the starting material for many dyes                                                                                      | 3, 8       | 1,000 - 10,000   |
| 106-50-3   | p-Phenylenediamine                                                | Sh   | Used for reinforcing tires and V-belts, as substitute for asbestos in brake linings, and for aerospace and sporting applications | 2, 3, 8    | 10,000 - 100,000 |
| 90-30-2    | N-Phenyl-1-naphthylamine                                          | Sh   | Used in the synthesis of/ dyes and other organic chemicals, and as rubber antioxidant                                            | 3, 8       | 100 - 1,000      |
| 135-88-6   | N-Phenyl-2-naphthylamine                                          | Sh   | Rubber antioxidant, lubricant and inhibitor                                                                                      | 3, 8       | NA               |

Continues on the next page ...

| CAS       | Sensitiser                                                    | Type | Somes uses (or remarks)                                                                                                                                                                                                | Isco          | TTB                   |
|-----------|---------------------------------------------------------------|------|------------------------------------------------------------------------------------------------------------------------------------------------------------------------------------------------------------------------|---------------|-----------------------|
| 85-44-9   | Phthalic anhydride                                            | Sa   | Use in the production of alkyd resins, plasticizers, as hardener for resins, polyesters, for synthesis of dyes, chlorinated products, pharmaceutical intermediates, insecticides, and as laboratory reagent            | 2, 3, 6, 8    | 100,000 - 1,000,000   |
|           | Phytases                                                      | Sa   | Used in the food industry                                                                                                                                                                                              | 3, 6, 8       | NA                    |
| 88-89-1   | Picric acid                                                   | Sh   | Uses in the production of explosives, matches and electric batteries, in the leather industry, and for the manufacture of colored glass                                                                                | 0, 3, 8, 9    | NA                    |
| 88-88-0   | Picryl chloride                                               | Sh   | Used for the production of acrylate adhesives, epoxy resin, concrete and gypsum impregnation                                                                                                                           | 3, 8          | 1,000 - 10,000        |
| 110-85-0  | Piperazine                                                    | Sah  | Used as a scrubber in gas-washer formulations, as a hardener for glue prepolymers and, as a raw material to prepare intermediates used for antihistamine production, and in the manufacture of insecticides and fibers | 3, 8          | 1000                  |
|           | Platinum compounds                                            | Sah  | Used in automobile catalytic converters                                                                                                                                                                                | 3, 7, 8       | NA                    |
| 9016-87-9 | ?Polymeric MDI?                                               | Sah  | Used as a binder resin for particle board                                                                                                                                                                              | 3, 8          | NA                    |
| 75-56-9   | N Propylene oxide                                             | Sh   | Used in the production of polyurethanes, lubricants, oil demulsifiers, as a solvent, herbicide, soil sterilant                                                                                                         | 3, 6, 8       | 1000000               |
| 8003-34-7 | Pyrethrum                                                     | Sh   | Insecticide                                                                                                                                                                                                            | 3, 6, 8       | NA                    |
| 106-51-4  | Quinone                                                       | Sh   | Used in the tanning of hides, making of gelatine insol, and strenghtening of animal fibers                                                                                                                             | 3, 8          | Intermediate Use Only |
| 108-46-3  | Resorcinol                                                    | Sh   | Used in In tanning; manufacturing resins, resin adhesives, hexylresorcinol, p-amino salicyclic acid, explosives, and dyes                                                                                              | 0, 3, 6, 8, 9 | 10,000 - 100,000      |
| 8050-09-7 | Rosin                                                         | Sh   | Natural resin with widely varying industrial applications such as in printing, paper industry, food and clothing industry                                                                                              | 3, 8          | 100,000 - 1,000,000   |
| 9006-04-6 | Rubber components (e.g. Dithiocarbamates, p-Phenylenediamine) | Sh   | Natural rubber is used in the production of pneumatic tires, rubber footwear, inflatable and sectional seals; elastic thread and tape floor coverings adhesives and solution                                           | 2, 3, 7, 8    | NA                    |
| 148-18-5  | Sodium diethyldithiocarbamate                                 | Sh   | Corrosive inhibitor, rubber accelerator, intermediate                                                                                                                                                                  | 3, 8          | 1,000 - 10,000        |
|           | Soya bean constituents                                        | Sa   |                                                                                                                                                                                                                        | 3, 6, 8       | NA                    |
| 9014-01-1 | Subtilisins                                                   | Sa   | Laundry detergent and automatic dishwashing for removal of proteinaceous stains. Animal feed for improved digestibility of proteins in animal feed. New industrial use for membrane cleaning                           | 3, 6, 8, 9    | 1,000 - 10,000        |

Continues on the next page ...

| CAS       | Sensitiser                                                | Type  | Some uses (or remarks)                                                                                                                                                                                                                                                                                                                                                                                                | Isco          | TTB                   |
|-----------|-----------------------------------------------------------|-------|-----------------------------------------------------------------------------------------------------------------------------------------------------------------------------------------------------------------------------------------------------------------------------------------------------------------------------------------------------------------------------------------------------------------------|---------------|-----------------------|
| 8002-26-4 | Tall oil, distilled                                       | Sh    | Used in the rubber and adhesive industry, in linoleum, soaps, fungicides, asphalt emulsions, and cutting oils                                                                                                                                                                                                                                                                                                         | 3, 8          | 10,000 - 100,000      |
| 54-64-8   | Thimerosal                                                | Sh    | Used as an ophthalmic preservative, a topical anti-infective, as a fungicide for cotton seed treatment, and as antimicrobial preservative in cosmetics                                                                                                                                                                                                                                                                | 3, 6, 8       | NA                    |
| 68-11-1   | N Thioglycolic acid                                       | Sh    | Reagent for iron, manufacture of thioglycolates, permanent-wave solutions and depilatories, vinyl stabilizer, manufacture of pharmaceuticals                                                                                                                                                                                                                                                                          | 2, 3, 5, 7    | 10,000 - 100,000      |
| 62-56-6   | Thiourea                                                  | Sh SP | Photographic toning agent, flame-retardant textile sizes and flame-retardant finish for cotton. Used for flame resistance and improved handling properties for nylon-based products. Nitrification inhibitor for ammonia-based fertilizer; intermediate for pesticides and fungicides                                                                                                                                 | 3, 6, 8       | 100 - 1,000           |
| 137-26-8  | Thiram                                                    | Sh    | Used as a fungicide in agriculture and food storage                                                                                                                                                                                                                                                                                                                                                                   | 6             | 1,000 - 10,000        |
| 95-80-7   | Toluene-2,4-diamine                                       | Sh    | Used in the production diisocyanates for the polyurethane industry                                                                                                                                                                                                                                                                                                                                                    | 3, 8          | Intermediate Use Only |
| 106-49-0  | p-Toluidine                                               | Sh    | Used as an intermediate in the production of different azo-pigments, quinacridone-pigments and paper dyes, pesticides and pharmaceuticals                                                                                                                                                                                                                                                                             | 3, 8          | 10,000 - 100,000      |
| 112-24-3  | Triethylenetetramine                                      | Sh    | Used as a chemical intermediate for polyamide resins, imidazoline, and aminoamide surfactants, and as a hardener for epoxy resins                                                                                                                                                                                                                                                                                     | 3, 8          | NA                    |
| 126-71-6  | Triisobutyl phosphate                                     | Sh    | Solvent used in the manufacture of paper and textiles                                                                                                                                                                                                                                                                                                                                                                 | 3, 8          | 1,000 - 10,000        |
| 552-30-7  | Trimellitic anhydride                                     | Sa    | Plasticizer for polyvinyl chloride, high-temperature plastics, wire insulation, gaskets, automotive upholstery, dyes, resins, and printing inks                                                                                                                                                                                                                                                                       | 3, 8          | 10,000 - 100,000      |
| 118-96-7  | 2,4,6-Trinitrotoluene                                     | Sh    | Used as a high explosive in military and industrial applications                                                                                                                                                                                                                                                                                                                                                      | 0, 2, 3, 8, 9 | 10,000 - 100,000      |
| 603-35-0  | Triphenyl phosphine                                       | Sh    | Used as an intermediate in pharmaceuticals, in organic synthesis and polymerization initiator                                                                                                                                                                                                                                                                                                                         | 3, 8          | 100                   |
| 4719-04-4 | 2,2',2''-(hexahydro-1,3,5-triazine-1,3,5-triyl)triethanol | Sh    | Used as a formaldehyde-releasing biocide in metalworking fluids, as an antimicrobial used to preserve adhesives, metalworking fluids, indoor construction materials, lubricants, aqueous mineral slurries, paints, stains, coatings, fuel and oil in storage, oil field drilling muds, inks and dyes, chemical and clinical reagents, industrial water systems, and household and industrial cleansers and detergents | 3, 7, 8, 9    | 10,000 - 100,000      |

Continues on the next page ...

| CAS        | Sensitiser                                        | Type | Somes uses (or remarks)                                                                                                                                                                                                                                   | Isco       | TTB              |
|------------|---------------------------------------------------|------|-----------------------------------------------------------------------------------------------------------------------------------------------------------------------------------------------------------------------------------------------------------|------------|------------------|
| 8006-64-2  | Turpentine                                        | Sh   | Solvent or dilution agent for oils, coatings, resins, paints and floor and shoe polishes.                                                                                                                                                                 | 2, 3, 8, 9 | 10,000 - 100,000 |
| 1484-13-5  | Vinylcarbazole                                    | Sh   | Used in the plastic industry                                                                                                                                                                                                                              | 3, 8       | NA               |
|            | Woods, various species                            | Sh   | The processing of woods includes a wide variety of industries such as sawmills, plywood mills, wood composites production, furniture factories and small workshops                                                                                        | 3, 7, 8, 9 | NA               |
| 37278-89-0 | Xylanases                                         | Sa   | Used in the production of animal feed, in the cellulose and paper industry, and in the starch and bread-making industries                                                                                                                                 | 3, 6, 7, 8 | NA               |
| 1477-55-0  | m-Xylylenediamine                                 | Sh   | Curing agent for epoxy resins                                                                                                                                                                                                                             | 3, 8       | 1,000 - 10,000   |
| 13530-65-9 | Zinc chromate                                     | Sh   | Used in priming paints for metals, artists' colours, pigment in automotive parts                                                                                                                                                                          | 2, 3, 8    | NA               |
|            | Zirconium and its insoluble and soluble compounds | Sah  | Used in cast iron and steel manufacturing, as pacifier and polishing powder for lens and television tubes, in arc lamps; pigment in plastics, making rayon spinnerets; in superconductive magnets; in making surgical appliances, and in nuclear reactors | 2, 3, 8    | NA               |

## C . List of mutagenic and reprotoxic substances

**Table 3:** Mutagenic and reprotoxic substances. Sources: [9, 11, 4, 5, 6, 12, 10].

| CAS        | Agent                                                   | Somes uses (or remarks)                                                                              | M  | RF | RE | ISCO       | TTB              |
|------------|---------------------------------------------------------|------------------------------------------------------------------------------------------------------|----|----|----|------------|------------------|
| 67-64-1    | Acetone                                                 | Solvent for fats, oils, waxes, resins, rubber, plastics, lacquers, varnishes, rubber cements         | NA | NA | B  | 3, 7, 8    | 10,000 - 100,000 |
| 35554-44-0 | 1-(2-Allyloxy)-2-(2,4-dichlorophenyl)ethyl)-1H-imidazol | Fungicide in agriculture, as a disinfectant for stable and kennel equipment                          | NA | NA | B  | 3, 6, 8, 9 | NA               |
| 1464-53-5  | 2,2'-Bioxirane                                          | Used for curing polymers, cross-linking textile fibers, and producing erythritol and pharmaceuticals | 2  | 3  | NA | 3, 8       | NA               |
| 112-49-2   | 1,2-Bis(2-methoxyethoxy)ethane                          | Used as a solvent for gases and coupling immiscible liquid                                           | NA | 2  | 2  | 3, 8       | 10 - 100         |

Continues on the next page ... .

| CAS        | Agent                                  | Some uses (or remarks)                                                                                                                                                                                                                                                  | M  | RF | RE | ISCO          | TTB                   |
|------------|----------------------------------------|-------------------------------------------------------------------------------------------------------------------------------------------------------------------------------------------------------------------------------------------------------------------------|----|----|----|---------------|-----------------------|
| 56-35-9    | Bis(tri-n-butyltin)oxide               | Used as an antimicrobial, disinfectant for hard surfaces, as sanitizer for laundry, in water-based paints and in adhesives, as preservative for wood, paper, textiles, and as pesticide                                                                                 | NA | 2  | 3  | 3, 6, 7, 8    | Intermediate Use Only |
| 10043-35-3 | Boric acid                             | Hydraulic fracturing fluid; insecticide; used for weatherproofing wood and fireproofing fabrics; as a preservative; manufacture of cements, crockery, porcelain, enamels, glass, borates, leather, carpets, hats, soaps; printing and dyeing, painting                  | NA | NA | B  | 3, 6, 8, 9    | 100,000 - 1,000,000   |
| 151-67-7   | 2-Bromo-2-chloro-1,1,1-trifluoroethane | Used as a medication and anaesthetic during surgical procedures                                                                                                                                                                                                         | NA | NA | 2  | 2, 3, 8       | NA                    |
| 2426-08-06 | 1-n-Butoxy-2,3-epoxypropan             | Reactive diluent for epoxy resins                                                                                                                                                                                                                                       | 2  | NA | NA | 3, 8          | NA                    |
| 688-73-3   | Tri-n-butyltin hydride                 | Reducing agent for the conversion of alkyl halides to hydrocarbons                                                                                                                                                                                                      | NA | NA | B  | 3, 8          | NA                    |
| 10605-21-7 | Carbendazim                            | An agricultural chemical and fungicide                                                                                                                                                                                                                                  | NA | NA | B  | 3, 6, 8, 9    | NA                    |
| 75-15-0    | Carbon disulfide                       | Used in optical glass, paints, enamels, varnishes, paint removers, tallow, explosives, rocket fuel, putty preservatives, rubber cement; as a solvent for waxes, lacquers, camphor, resins, and vulcanized rubber                                                        | NA | NA | B  | 3, 7, 8, 9    | 100,000 - 1,000,000   |
| 630-08-0   | Carbon monoxide                        | It is a product of the incomplete combustion of carbon-containing fuels and is also produced by natural processes. Reducing agent in metallurgical operations. Used in the production of several chemical intermediates                                                 | NA | NA | B  | 3, 8, 9       | 100,000 - 1,000,000   |
| 4080-31-3  | N-(3-Chloroallyl)hexaminium chloride   | Microbicide, industrial adhesives and coatings; resin, latex, and polymer emulsions; metalworking cutting fluids; oil recovery drilling muds/packer fluids; textiles fibers and cordage; preservative in cosmetics, hair care products, soaps, adhesives, joint cements | NA | NA | B  | 3, 6, 8, 9    | NA                    |
| 6147-53-1  | Cobalt(II) acetate tetrahydrate        | Used in sympathetic inks, feed additives, catalysts, foam stabilizers, driers for coatings, and anodizing                                                                                                                                                               | 3  | 2  | NA | 3, 8          | NA                    |
| 513-79-1   | Cobaltcarbonat                         | Used in ceramics, manufacture of Cobalt pigments, and preparation of Cobalt compounds                                                                                                                                                                                   | 3  | 2  | NA | 3, 8          | 1,000 - 10,000        |
| 7646-79-9  | Cobalt dichloride                      | Used as Invisible ink, humidity and water indicator; in hygrometers; temperature indicator in grinding; in electroplating; for painting on glass and porcelain, in the preparation of catalysts; as fertilizer and feed additive                                        | 3  | 2  | NA | 2, 3, 6, 8, 9 | 1,000 - 10,000        |

Continues on the next page ... .



| CAS        | Agent                           | Somes uses (or remarks)                                                                                                                                                                                                                                         | M  | RF | RE | ISCO             | TTB                    |
|------------|---------------------------------|-----------------------------------------------------------------------------------------------------------------------------------------------------------------------------------------------------------------------------------------------------------------|----|----|----|------------------|------------------------|
| 10026-22-9 | Cobalt(II) nitrate hexahydrate  | Used to make cobalt pigments, invisible inks, catalysts, and vitamin B12 supplements, and for decorating stoneware and porcelain                                                                                                                                | 3  | 2  | NA | 3, 7, 8          | NA                     |
| 84-74-2    | Dibutyl phthalat (DBP)          | Used as a solvent for chlorinated rubber, plasticizer in nitrocellulose lacquers, elastomers, explosives, nail polish and solid rocket propellants; as a solvent for perfume oils; in adhesives and as insect repellent for textiles                            | NA | 2  | 2  | 0, 3, 5, 7, 8, 9 | 1,000 - 10,000         |
| 111-96-6   | Diethylene glycol dimethylether | Solvent in chemical reactions involving metals and organometallic compounds; used in the production of plastics                                                                                                                                                 | NA | NA | B  | 3, 8             | 100 - 1,000            |
| 127-19-5   | N,N-Dimethylacetamide           | Solvent for plastics, resins, gums, and electrolytes; catalyst; paint remover; high-purity solvent for crystallization and purification                                                                                                                         | NA | 3  | 2  | 3, 8             | 10,000 - 100,000       |
| 68-12-2    | N,N-Dimethylformamide           | Solvent for liquids, gases, for orlon and similar polyacrylic fibers, pharmaceutical processing, leather fabrics, reagent and catalyst in organic chemistry                                                                                                     | NA | NA | B  | 3, 7, 8          | 10,000 - 100,000       |
| 646-06-0   | 1,3-Dioxolane                   | Low-boiling solvent and extractant for oils, fats, waxes, dyes, and cellulose derivatives; co-monomer for manufacture of polyacetals and other polymers, solvent for chemical reactions                                                                         | NA | NA | B  | 3, 8             | 1,000 - 10,000         |
| 110-80-5   | 2-Ethoxyethanol                 | Solvent for nitrocellulose, lacquers and dopes; in varnish removers, cleansing solutions, dye baths; finishing leather with water pigments and dye solutions; increasing stability of emulsions; solvent for epoxy and other coatings, printing inks, adhesives | NA | NA | B  | 3, 7, 8, 9       | 1,000 - 10,000         |
| 111-15-9   | 2-Ethoxyethyl acetate           | In automobile lacquers to retard evaporation and impart high gloss, for nitrocellulose, oils, and resins, in wood stains and varnish removers, and in products for the treatment of textiles and leathers                                                       | NA | NA | B  | 3, 8, 9          | NA                     |
| 7439-92-1  | Lead, compounds                 | Used in mining and smelting, in lead-acid bateries, crystal glass, in paints and ink, ammunition, cable and wire production, in bridges, ships, steel towers, in metal recycling                                                                                | NA | 3  | 1  | 3, 7, 8, 9       | 1,000,000 - 10,000,000 |
| 72-43-5    | Methoxychlor                    | Insecticide used in agriculture, dairies, and in household and industrial premises                                                                                                                                                                              | NA | NA | B  | 3, 6, 8          | NA                     |
| 625-45-6   | Methoxyacetic acid              | Used in organic synthesis in the chemical industry                                                                                                                                                                                                              | NA | NA | B  | 3, 8             | Intermediate Use Only  |
| 109-86-4   | 2-Methoxyethanol                | Solvent for low viscosity cellulose acetate, natural resins, some synthetic resins; used in dyeing leather and in quick drying varnishes, enamels, nail polishes, wood stains                                                                                   | NA | NA | B  | 3, 7, 8          | 1,000 - 10,000         |

Continues on the next page ...

| CAS        | Agent                                  | Some uses (or remarks)                                                                                                                                                                                                                                                                                 | M  | RF | RE | ISCO          | TTB                    |
|------------|----------------------------------------|--------------------------------------------------------------------------------------------------------------------------------------------------------------------------------------------------------------------------------------------------------------------------------------------------------|----|----|----|---------------|------------------------|
| 110-49-6   | 2-Methoxyethylacetat                   | Industrial solvent for various gums, resins, waxes, oils; textile printing; photographic film; lacquers; dopes                                                                                                                                                                                         | NA | NA | B  | 3, 7, 8       | Intermediate Use Only  |
| 1589-47-5  | 2-Methoxypropanol-1                    | It is a byproduct during the synthesis of 1-methoxy-2-hydroxypropane                                                                                                                                                                                                                                   | NA | NA | B  | 3, 8          | NA                     |
| 70657-70-4 | 2-Methoxypropyl acetate                | Permitted for use as an inert ingredient in non-food pesticide products; solvent                                                                                                                                                                                                                       | NA | NA | B  | 3, 8, 9       | NA                     |
| 74-87-3    | Methyl chloride                        | Foaming agent in plastics industry, refrigerant, fluid for thermometric and thermostatic equipment, methylating agent in organic synthesis, herbicide                                                                                                                                                  | NA | NA | B  | 3, 6, 8, 9    | 1,000,000 - 10,000,000 |
| 23696-28-8 | Olaquinox                              | Used as veterinary growth stimulant                                                                                                                                                                                                                                                                    | 2  | 3  | NA | 3, 6, 8       | NA                     |
| 335-67-1   | Perfluorooctanoic acid                 | Used in fire-fighting applications, cosmetics, greases and lubricants, paints, polishes and adhesives                                                                                                                                                                                                  | NA | NA | B  | 3, 5, 7, 8    | NA                     |
| 1763-23-1  | Perfluorooctane sulfonic acid          | Surfactant in fire fighting foam; surfactant for alkaline cleaners; emulsifier in floor polish; mist suppressant for metal plating baths; surfactant for etching acids for circuit boards; pesticide active ingredient for ant bait traps                                                              | NA | NA | B  | 3, 5, 7, 8    | NA                     |
| 62-74-8    | Sodium fluoroacetate                   | Rodenticide, used also for control of wild rabbits, wild dogs and wild pigs                                                                                                                                                                                                                            | NA | NA | B  | 3, 8, 9       | NA                     |
| 3811-73-2  | Sodium omadine                         | Used as biocide in metalworking, cutting, cooling, and lubricating fluids, latex emulsions, aqueous fiber lubricants and inks, laundry rinse additives and detergents, carpet cleaners, analytical and diagnostic reagents; also used as preservative for water based mixtures used in making concrete | NA | NA | B  | 3, 8, 9       | Intermediate Use Only  |
|            | Tobacco smoke, second-hand             | Exposure depends on tobacco-smoke regulation                                                                                                                                                                                                                                                           | 3  | NA | 1  | 5, 9          | NA                     |
| 87-86-5    | Pentachlorophenol                      | Insecticide for termite control; general herbicide. Antimicrobial preservative and fungicide for wood, textiles, paints, adhesives, leather, pulp, paper, industrial waste systems, and building materials                                                                                             | 3  | NA | 2  | 3, 6, 7, 8, 9 | NA                     |
| 1336-36-3  | Polychlorinated biphenyls              | Exposure in buildings and old devices contaminated with PCB                                                                                                                                                                                                                                            | NA | 2  | 2  | 8, 9          | NA                     |
| 5216-25-1  | alpha,alpha,alpha,4-Tetrachlorotoluene | Used as intermediate for pharmaceuticals, dyes, and other organic chemicals                                                                                                                                                                                                                            | NA | 2  | NA | 3, 8          | Intermediate Use Only  |
| 96-18-4    | 1,2,3-Trichloropropane                 | Used as an intermediate in the production of polysulfone liquid polymers, dichloropropene and hexafluoropropylene                                                                                                                                                                                      | 3  | 2  | NA | 3, 8          | 1,000 - 10,000         |

Continues on the next page ...

| CAS       | Agent                                                           | Somes uses (or remarks)                                                                                                                                                                                                                              | M  | RF | RE | ISCO       | TTB                   |
|-----------|-----------------------------------------------------------------|------------------------------------------------------------------------------------------------------------------------------------------------------------------------------------------------------------------------------------------------------|----|----|----|------------|-----------------------|
| 112-27-6  | Triethylene glycol                                              | Bacteriostatic agent for air sanitization and deodorization. In compounds used as a fungicide, virucide, miticide and insecticide. As an inert ingredient facilitates delivery of formulated pesticides used as herbicides, fungicides, insecticides | NA | NA | B  | 3, 6, 8, 9 | 10,000 - 100,000      |
| 512-56-1  | Trimethyl phosphate                                             | Gasoline additive; methylating agent, intermediate in the production of polymethyl polyphosphates; flame retardant solvent for paints and polymers                                                                                                   | 2  | NA | NA | 3, 8, 9    | NA                    |
| 115-96-8  | Tris(2-chlorethyl)phosphat                                      | Used as an additive plasticiser and viscosity regulator with flame-retarding properties for polyurethane, polyesters, polyvinyl chloride and other polymers                                                                                          | NA | 2  | NA | 3, 8       | 10 - 100              |
| 2451-62-9 | 1,3,5-Tris(oxiranylmethyl)-1,3,5-triazin-2,4,6(1H,3H,5H)-trione | Used in polyester powder coatings (paints)                                                                                                                                                                                                           | 2  | 3  | NA | 3, 8       | 100 - 1,000           |
| 81-81-2   | Warfarin                                                        | Rodenticide applied in houses, animal and agricultural premises, and commercial and industrial sites                                                                                                                                                 | NA | NA | B  | 3, 6, 8, 9 | Intermediate Use Only |

## D . List of pathogens

**Table 4:** Pathogens by species, risk group according to EU Directive 2000/54/EC, and occupational class. Reference: [13].

| Pathogen                                       | Classification | Type      | ISCO       |
|------------------------------------------------|----------------|-----------|------------|
| Aspergillus fumigatus                          | 2              | Fungus    | 3, 6, 8, 9 |
| Bordetella pertussis                           | 2              | Bacterium | 2, 3       |
| Borrelia burgdorferi                           | 2              | Bacterium | 5, 6, 9    |
| Campylobacter jejuni                           | 2              | Bacterium | 7          |
| Campylobacter spp.                             | 2              | Bacterium | 2, 6, 7, 9 |
| Central European tick-borne encephalitis virus | 3              | Virus     | 6          |
| Chlamydia trachomatis                          | 2              | Bacterium | 5          |
| Clostridium tetani                             | 2              | Bacterium | 2, 6, 9    |
| Coxiella burnetii                              | 3              | Bacterium | 6          |

Continues on the next page ... ..

| Pathogen                                                        | Classification | Type      | ISCO             |
|-----------------------------------------------------------------|----------------|-----------|------------------|
| Cryptosporidium parvum                                          | 2              | Parasite  | 5                |
| Cytomegalovirus                                                 | 2              | Virus     | 2, 5             |
| Echinococcus multilocularis                                     | 3              | Parasite  | 6                |
| Escherichia coli, verocytotoxigenic strains                     | 3              | Bacterium | 6, 7, 9          |
| Escherichia coli (with the exception of non-pathogenic strains) | 2              | Bacterium | 6, 7, 9          |
| Francisella tularensis (Type A)                                 | 3              | Bacterium | 6                |
| Francisella tularensis (Type B)                                 | 2              | Bacterium | 6                |
| Giardia lamblia (Giardia intestinalis)                          | 2              | Parasite  | 3, 5             |
| Helicobacter pylori                                             | 2              | Bacterium | 2, 3, 6, 9       |
| Hepatitis A virus (human enterovirus type 72)                   | 2              | Virus     | 5, 9             |
| Hepatitis B virus                                               | 3              | Virus     | 2, 3             |
| Hepatitis C virus                                               | 3              | Virus     | 2, 3, 5, 9       |
| Histoplasma capsulatum duboisii                                 | 3              | Fungus    | 8                |
| Human herpes virus 7                                            | 2              | Virus     | 2, 3, 5          |
| Human herpes virus 8                                            | 2              | Virus     | 2, 3, 5          |
| Human immunodeficiency viruses                                  | 3              | Virus     | 2, 3, 5          |
| Human papillomaviruses                                          | 2              | Virus     | 5                |
| Influenza viruses types A, B and C                              | 2              | Virus     | 2, 3, 5, 6, 7, 9 |
| Legionella pneumophila                                          | 2              | Bacterium | 8                |
| Leishmania spp.                                                 | 2              | Parasite  | 0                |
| Leptospira interrogans (all serovars)                           | 2              | Bacterium | 5, 6, 7, 9       |
| Measles virus                                                   | 2              | Virus     | 2, 3             |
| Mumps virus                                                     | 2              | Virus     | 2, 3             |
| Mycobacterium bovis (except BCG strain)                         | 3              | Bacterium | 2, 3, 6, 9       |
| Mycobacterium chelonae                                          | 2              | Bacterium | 8                |
| Mycobacterium tuberculosis                                      | 3              | Bacterium | 2, 3, 5, 9       |
| Neisseria gonorrhoeae                                           | 2              | Bacterium | 5                |
| Neisseria meningitidis                                          | 2              | Bacterium | 2, 3             |
| Pasteurella multocida                                           | 2              | Bacterium | 2, 3             |
| Pseudomonas aeruginosa                                          | 2              | Bacterium | 7                |
| Rhinoviruses                                                    | 2              | Virus     | 3                |
| Rickettsia conorii                                              | 3              | Bacterium | 6                |
| Rubivirus                                                       | 2              | Virus     | 2, 3             |
| Staphylococcus aureus                                           | 2              | Bacterium | 2, 3, 6, 7, 9    |
| Streptococcus pyogenes                                          | 2              | Bacterium | 2, 3, 7          |

Continues on the next page ... .

| Pathogen                  | Classification | Type      | ISCO          |
|---------------------------|----------------|-----------|---------------|
| Strongyloides stercoralis | 2              | Parasite  | 6, 9          |
| Toxocara canis            | 2              | Parasite  | 2, 5, 6, 7, 9 |
| Toxoplasma gondii         | 2              | Parasite  | 2, 5, 6, 9    |
| Treponema pallidum        | 2              | Bacterium | 5             |
| Varicella zoster virus    | 2              | Virus     | 2             |
| West Nile fever virus     | 3              | Virus     | 3             |

## References

- [1] IARC (2012). *A Review of Human Carcinogens: Chemical Agents and Related Occupations. Volume 100F*. Lyon: IARC.
- [2] IARC (2012). *A Review of Human Carcinogens: Radiation. Volume 100D*. Lyon: IARC.
- [3] IARC (2012). *A Review of Human Carcinogens: Arsenic, Metals, Fibres, and Dusts. Volume 100C*. Lyon: IARC.
- [4] Elvers, B. (Ed.) (2000). *Ullmann's Encyclopedia of Industrial Chemistry*. Wiley-VCH.
- [5] National Library of Medicine, Hazardous Substances Data Bank. URL <http://toxnet.nlm.nih.gov/index.html>.
- [6] National Library of Medicine, Haz-Map. URL <http://hazmap.nlm.nih.gov>.
- [7] Kauppinen, T., Toikkanen, J., Pedersen, D., et al. (2000). Occupational exposure to carcinogens in the European Union. *Occupational and Environmental Medicine*, 57(1):10–18, doi:10.1136/oem.57.1.10.
- [8] Rushton, L., Bagga, S., Bevan, R., et al. (2010), The burden of occupational cancer in Great Britain. URL <http://www.hse.gov.uk/cancer/>.
- [9] Bundesanstalt für Arbeitsschutz und Arbeitsmedizin (2008), Technische Regeln für Gefahrstoffe TRGS 905. URL <http://www.baua.de/en>.
- [10] European Chemicals Agency, Registered Substances under the REACH regulation. URL <http://echa.europa.eu/>.
- [11] Bundesanstalt für Arbeitsschutz und Arbeitsmedizin (2004), Criteria for the Classification of Biological Agents TRBA 450. URL <http://www.baua.de/en>.
- [12] Deutsche Forschungsgemeinschaft (DFG) (2013). *List of MAK and BAT Values 2013: Maximum Concentrations and Biological Tolerance Values at the Workplace*. Weinheim: Wiley, doi:10.1002/9783527675128.ch4.
- [13] Haagsma, J.A., Tariq, L., Heederik, D.J., et al. (2012). Infectious disease risks associated with occupational exposure: a systematic review of the literature. *Occupational and environmental medicine*, 69(2):140–146, doi:10.1136/oemed-2011-100068.
